# Supplementary material
Source: publisher figshare collection journal article supplement (https://sage.figshare.com/ndownloader/files/13110524)
Supplement: Supplementary file 1 [file 13110524]

Supplementary Table: List of variables used in the current study for the Frailty Index

|                                |                                          |                                    |
|--------------------------------|------------------------------------------|------------------------------------|
| Changes in everyday activities | Tiredness all the time                   | Seizures, partial complex          |
| Facial bradykinesia            | Clinical impression of depression        | Seizures, generalized              |
| Problems getting dressed       | Sleep changes                            | Syncope or blackouts               |
| Urinary incontinence           | Restlessness                             | Breast problems                    |
| Toileting problems             | Memory changes                           | Cerebrovascular problems           |
| Gastrointestinal problems      | Short-term memory impairment             | History of stroke                  |
| Problems cooking               | Long-term memory impairment              | History of diabetes mellitus       |
| Problems going out alone       | Changes in general cognitive functioning | Arterial hypertension              |
| Impaired mobility              | Onset of cognitive symptoms              | Peripheral pulses                  |
| Falls                          | Delirium                                 | Cardiac problems                   |
| Musculoskeletal problems       | Paranoid features                        | Myocardial infarction              |
| Bradykinesia of the limbs      | Cognitive impairment history             | Arrhythmia                         |
| Poor muscle tone in limbs      | Cognitive impairment family history      | Congestive heart failure           |
| Poor limb coordination         | Impaired vibration                       | Lung problems                      |
| Poor coordination, trunk       | Tremor at rest                           | Respiratory problems               |
| Poor standing posture          | Postural tremor                          | History of thyroid disease         |
| Irregular gait pattern         | Intention tremor                         | Thyroid problems                   |
| Mood problems                  | History of Parkinson's disease           | Malignant disease                  |
| Feeling sad, depressed         | Family history of degenerative disease   | Presence of snout reflex           |
| History of depressed mood      | Swallowing problems                      | Presence of the palmomental reflex |
|                                |                                          | Other medical history              |
